# Supplementary material for: Pharmaceutical Repurposing Strategies for Metabolic Disorders: Insights from Mendelian Randomization Studies
Source: bioRxiv or medRxiv preprint supplement (doi:10.1101/2024.03.29.24305070), 2024-03-30
Supplement: Supplementary file [file media-1.pdf]

# A

## Number of causal genes for Disease MR

Causal genes found for 27 of 30 diseases

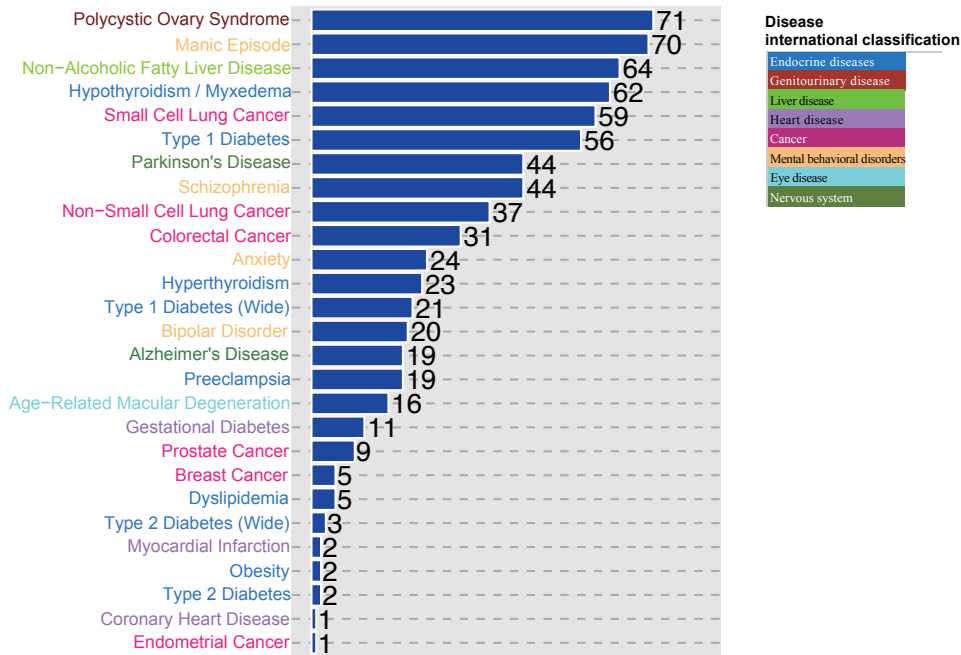

Source: MR Result

# C

## Disease Drug Prediction Network

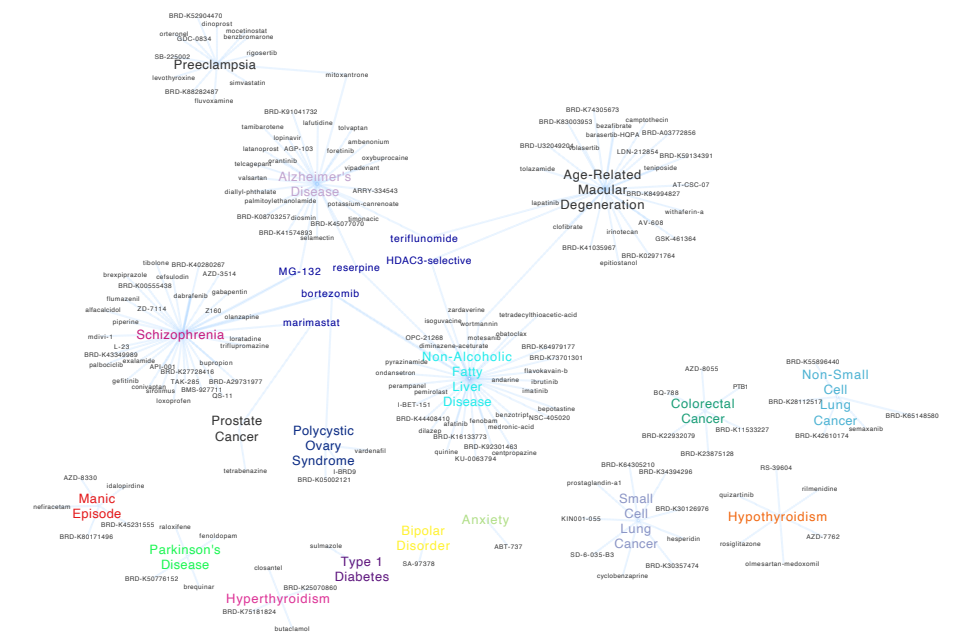

# B

## Functional enrichment analysis of Disease causal association genes

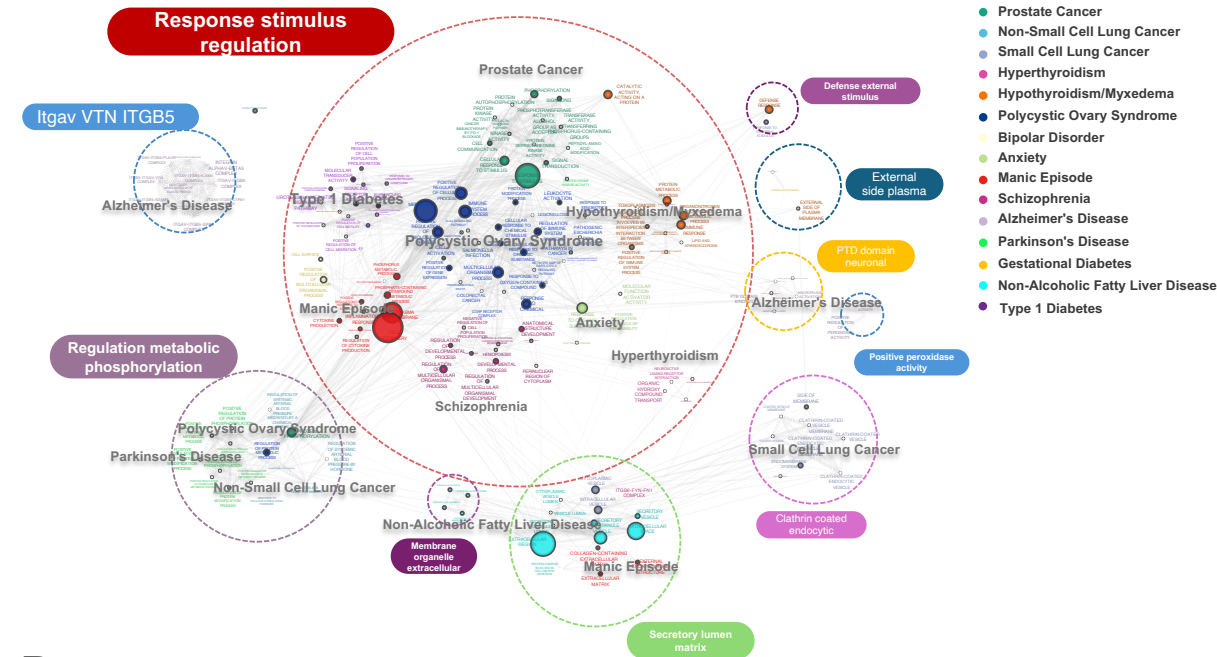

# D

## Disease drug prediction frequency distribution

17 diseases have been predicted to have related drugs  
\*SignatureSearch Database prediction\*

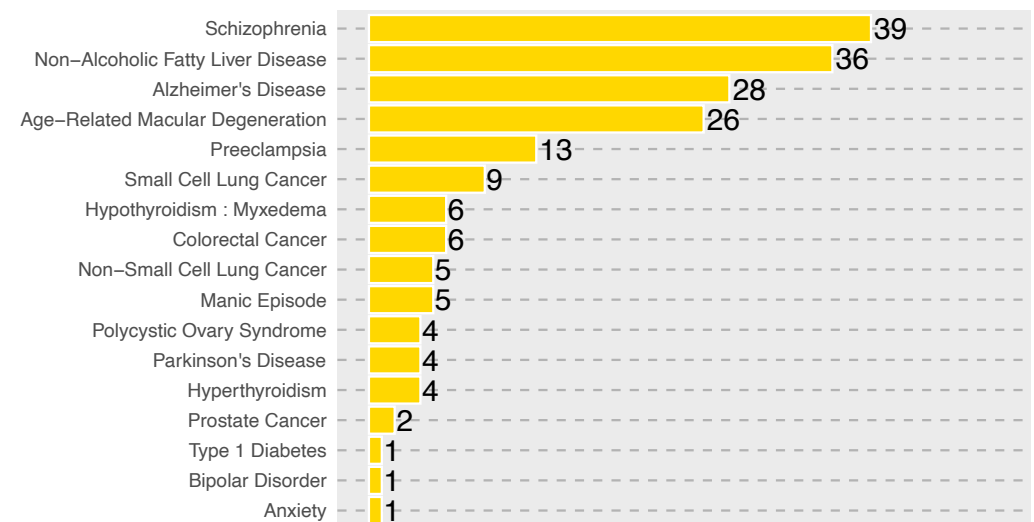

Source: p-value(up)< 0.01, p-value(down)< 0.01, z-score (sum)< -3
